# Supplementary material for: Monoclonal Antibodies Targeting the Alpha-Exosite of Botulinum Neurotoxin Serotype/A Inhibit Catalytic Activity
Source: PubMed Central journal article supplement (PMC4537209; doi:10.1371/journal.pone.0135306), 2015-08-14
Supplement: pone.0135306.s004.pdf [file pone.0135306.s004.pdf]

**Table S2. BoNT/A LC mutants that eliminated mAb binding**

| <b>mAb</b>    | <b>Mutants that eliminate mAb binding</b>       |
|---------------|-------------------------------------------------|
| <b>7C8</b>    | F3A; K6A; T122A; D141A                          |
| <b>10F9</b>   | K291A, K337A, D339A, K340A, R283A; T122A; D141A |
| <b>12A11</b>  | F3A; K6A; T122A; D141A                          |
| <b>1D2</b>    | T122A; D141A                                    |
| <b>10B4</b>   | L284A, N288A, K291A, L341A; T122A; D141A        |
| <b>ING2</b>   | F3A; K6A; T122A; D141A                          |
| <b>5A20.4</b> | K381A; V382A; T122A; D141A                      |
