# Supplementary material for: Monoclonal Antibodies Targeting the Alpha-Exosite of Botulinum Neurotoxin Serotype/A Inhibit Catalytic Activity
Source: PubMed Central journal article supplement (PMC4537209; doi:10.1371/journal.pone.0135306), 2015-08-14
Supplement: pone.0135306.s008.pdf [file pone.0135306.s008.pdf]

**Table S6.  $K_D$  and  $\Delta\Delta G$  of selected BoNT/A LC alanine mutants for fine epitope mapping.**

| 7C8                 |            |                      |                                | 12A11              |            |                      |                                | ING2               |            |                      |                                |
|---------------------|------------|----------------------|--------------------------------|--------------------|------------|----------------------|--------------------------------|--------------------|------------|----------------------|--------------------------------|
| Mutant              | $K_D$ (pM) | Ratio $K_D$<br>Mt/Wt | $\Delta\Delta G$<br>(kcal/mol) | Mutant             | $K_D$ (pM) | Ratio $K_D$<br>Mt/Wt | $\Delta\Delta G$<br>(kcal/mol) | Mutant             | $K_D$ (pM) | Ratio $K_D$<br>Mt/Wt | $\Delta\Delta G$<br>(kcal/mol) |
| Y144A               | 410.8      | 3.80                 | 0.78                           | V14A               | 289.5      | 2.32                 | 0.49                           | K6A                | 558.3      | 3.69                 | 0.76                           |
| S522A               | 291.1      | 2.69                 | 0.58                           | K23A               | 384.1      | 3.09                 | 0.66                           | V17A               | 3654       | 24.2                 | 1.85                           |
| D523A               | 293.2      | 2.71                 | 0.58                           | Q29A               | 551.6      | 4.44                 | 0.87                           | D18A               | 2377       | 15.7                 | 1.61                           |
| I524A               | 168.3      | 3.41                 | 0.71                           | P32A               | 428.6      | 3.45                 | 0.72                           | K37A               | 361.0      | 2.39                 | 0.51                           |
| P32A                | 529.0      | 4.90                 | 0.92                           | I138A              | 210.9      | 1.69                 | 0.31                           | N40A               | 645.1      | 4.27                 | 0.85                           |
| A LC-H <sub>N</sub> | 108.0      | -                    | -                              | Y144A              | 451.4      | 3.63                 | 0.75                           | N514A              | 2165       | 14.3                 | 1.55                           |
|                     |            |                      |                                | S522A              | 843.1      | 6.78                 | 1.11                           | I515A              | 161.9      | 1.07                 | 0.04                           |
|                     |            |                      |                                | D523A              | 2132       | 17.2                 | 1.65                           | E147A              | 340.4      | 2.25                 | 0.47                           |
|                     |            |                      |                                | I524A              | 660.4      | 5.32                 | 0.97                           | A-LCH <sub>N</sub> | 151.3      | /                    | /                              |
|                     |            |                      |                                | A-LCH <sub>N</sub> | 124.2      | -                    | /                              |                    |            |                      |                                |

| 10F9   |                        |                               |                   | 10B4   |                     |                               |                   | 5A20.4 |                     |                               |                   |
|--------|------------------------|-------------------------------|-------------------|--------|---------------------|-------------------------------|-------------------|--------|---------------------|-------------------------------|-------------------|
| Mutant | K <sub>D</sub><br>(pM) | Ratio K <sub>D</sub><br>Mt/Wt | ΔΔG<br>(kcal/mol) | Mutant | K <sub>D</sub> (pM) | Ratio K <sub>D</sub><br>Mt/Wt | ΔΔG<br>(kcal/mol) | Mutant | K <sub>D</sub> (pM) | Ratio K <sub>D</sub><br>Mt/Wt | ΔΔG<br>(kcal/mol) |
| L322A  | 235.2                  | 1.59                          | 0.27              | F282A  | 7.05                | 2.32                          | 0.49              | N377A  | 207.9               | 1.55                          | 0.25              |
| F331A  | 1683                   | 11.4                          | 1.42              | L284A  | 165.4               | 54.5                          | 2.33              | V379A  | 212.8               | 1.58                          | 0.27              |
| V333A  | 3901                   | 26.4                          | 1.91              | Y285A  | 6.59                | 2.17                          | 0.45              | K381A  | 41823               | 311                           | 3.34              |
| K335A  | >>                     | -                             | >3.5              | Y286A  | 5.82                | 1.92                          | 0.38              | V382A  | 1999                | 14.9                          | 1.57              |
| L336A  | >>                     | -                             | >3.5              | Y287A  | 82.78               | 27.3                          | 1.92              | T385A  | 340.7               | 2.53                          | 0.54              |
| K337A  | >>                     | -                             | >3.5              | N288A  | 253.8               | 83.6                          | 2.58              | L392A  | 508.1               | 3.78                          | 0.77              |
| D339A  | 363.3                  | 2.46                          | 0.52              | K289A  | 4.72                | 1.56                          | 0.26              | N394A  | 197.8               | 1.47                          | 0.23              |
| K340A  | >>                     |                               | >3.5              | F290A  | 153.6               | 50.3                          | 2.28              | T395A  | 196.7               | 1.46                          | 0.22              |
| L341A  | 6004                   | 40.6                          | 2.16              | K291A  | 1399                | 461                           | 3.57              | L397A  | 201.2               | 1.49                          | 0.24              |
| K343A  | 398.9                  | 2.70                          | 0.58              | S295A  | 6.70                | 2.20                          | 0.46              | N409A  | 275.0               | 2.05                          | 0.42              |
| A-LC*  | 160.5                  | -                             | -                 | N298A  | 413.9               | 136                           | 2.86              | N412A  | 208.6               | 1.55                          | 0.26              |

|        |       |      |      |       |       |      |      |      |       |   |   |
|--------|-------|------|------|-------|-------|------|------|------|-------|---|---|
| R105A  | 118.0 | 2.21 | 0.46 | K299A | 60.92 | 20.1 | 1.75 | A-LC | 134.4 | / | / |
| D102A  | 108.8 | 2.04 | 0.42 | K330A | 20.42 | 6.72 | 1.11 |      |       |   |   |
| V112A  | 182.1 | 3.41 | 0.71 | F331A | 46.55 | 15.3 | 1.59 |      |       |   |   |
| R113A* | 129.5 | 2.43 | 0.52 | A-LC  | 3.04  | /    | /    |      |       |   |   |
| A-LC   | 53.4  | -    | -    |       |       |      |      |      |       |   |   |

\* The KDs of the mutants were measured in two different batches of the wide type A-LC.
